# Supplementary material for: In situ surface cleaning on a Ge substrate using TMA and MgCp2for HfO2-based gate oxides
Source: Royal Society of Chemistry journal article supplement (doi:10.1039/c4tc02686a), 2015-01-01
Supplement: c4tc02686a1.pdf [file c4tc02686a1.pdf]

Supporting Information

**In Situ Surface cleaning on a Ge Substrate using TMA and MgCp<sub>2</sub> for HfO<sub>2</sub>-based Gate Oxides**

Il-Kwon Oh,<sup>a</sup> Kangsik Kim,<sup>b</sup> Zonghoon Lee,<sup>b</sup> Jeong-Gyu Song,<sup>a</sup> Chang-Wan Lee,<sup>a</sup> David Thompson,<sup>c</sup> Han-Bo-Ram Lee,<sup>d</sup> Woo-Hee Kim,<sup>e</sup> Wan Joo Maeng<sup>f\*</sup> and Hyungjun Kim<sup>a\*</sup>

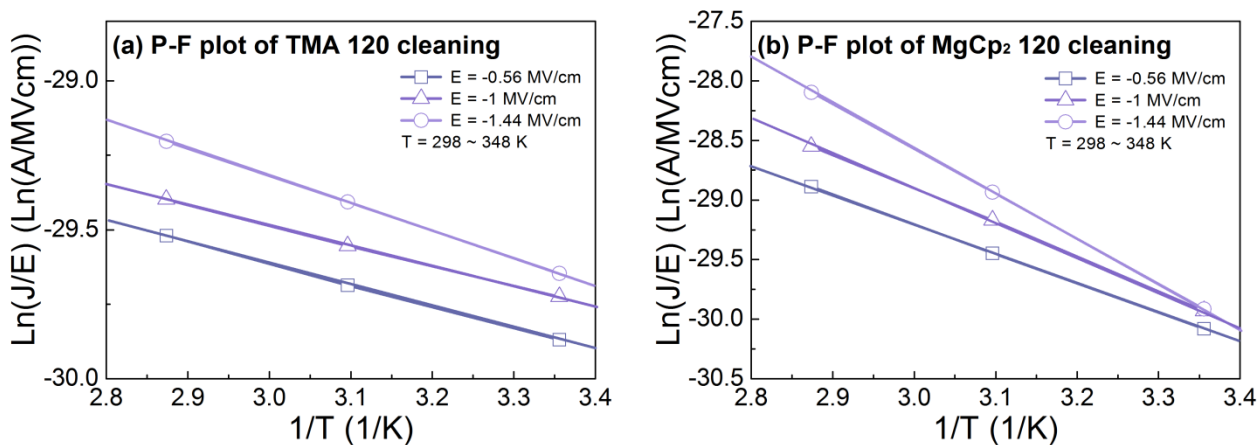

**Supporting information 1** Poole-Frenkel conduction by doping temperature-dependent  $J_g$  measurement, (a) TMA 120s cleaning and (b) MgCp<sub>2</sub> 120s cleaning one. The fitted line slope of  $\ln(J/E)$  versus  $1000/T$  yields the trap energy levels from the conduction band of HfO<sub>2</sub>, the effective values of which were determined to be 0.64 and 0.53 eV for 120s TMA- and MgCp<sub>2</sub>-cleaned samples, respectively. This indicates that the trap energy levels of the 120s MgCp<sub>2</sub>-cleaned sample are slightly lower than those of the 120s TMA-cleaned sample.

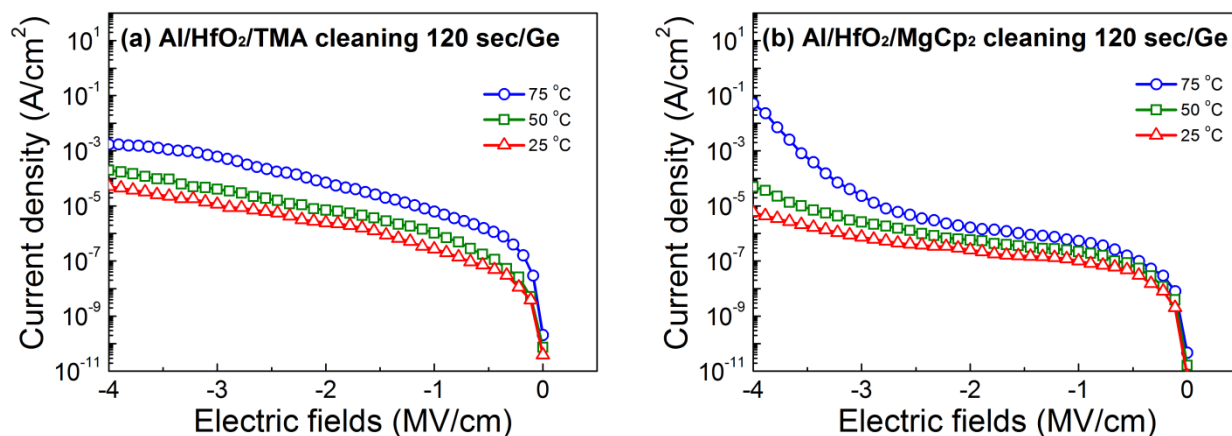

Supporting information 2 I-V curves of MOS capacitors with (a) TMA 120s cleaning and (b) MgCp<sub>2</sub> 120s cleaning measured at 25, 50, and 75 °C. At high temperatures, since the trap energy level of the 120s MgCp<sub>2</sub>-cleaned sample is closer to the conduction band minimum, the leakage currents of the 120s MgCp<sub>2</sub>-cleaned sample are larger than those of TMA.

## Notes and references

<sup>a</sup> School of Electrical and Electronics Engineering, Yonsei University, 262 Seongsanno, Seodaemun-gu, Seoul, Korea

<sup>b</sup> School of Materials Science and Engineering, Ulsan National Institute of Science and Technology (UNIST), UNIST-gil 50, Eonyang-eup, Ulju-gun, Ulsan, 689-798, Korea

<sup>c</sup> Applied Materials, Sunnyvale, CA 94085, USA

<sup>d</sup> Department of Materials Science and Engineering, Incheon National University, 119 Academy-ro, Yeonsu-gu, Incheon, Korea

<sup>e</sup> Department of Chemical Engineering, Stanford University, 381 North-South Mall, Stanford, California 94305, United States

<sup>f</sup> Department of Materials Science and Engineering, University of Wisconsin Madison, Madison, Wisconsin 53706, USA
